# Supplementary material for: Chronic Intermittent Hypoxia Increases Cell Proliferation in Hepatocellular Carcinoma
Source: MDPI journal article supplement (doi:10.3390/cells11132051), 2022-06-28
Supplement: s1 [file s1]

## Supplementary Material

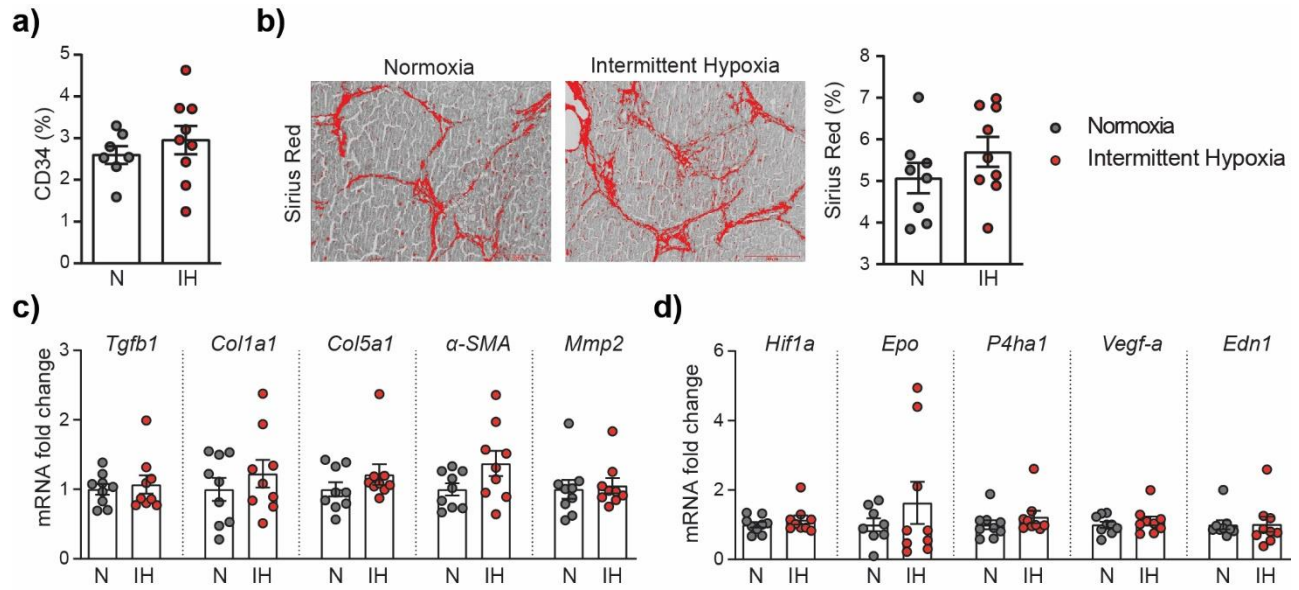

**Figure S1.** The impact of intermittent hypoxia on **a)** vascularization determined by CD34 staining and **b)** fibrosis status determined by Sirius red staining, **c)** qPCR analysis of fibrosis related genes and **d)** qPCR analysis of genes related to HIF-1 signaling. Each circle represents an individual animal, mean  $\pm$  SE, n = 9/group. Comparison of means was performed by unpaired t test.

**Table S1.** Table of predesigned TaqMan probe (Thermofisher).

| Gene name            | TaqMan probe / Reference |
|----------------------|--------------------------|
| <b>Ccnd1</b>         | Rn00432359_m1            |
| <b>Pbk</b>           | Rn01534901_m1            |
| <b>Mybl2</b>         | Rn01750242_m1            |
| <b>Tgfb</b>          | Rn00565937_m1            |
| <b>Col1a1</b>        | Rn01463848_m1            |
| <b>Col5a1</b>        | Rn00593170_m1            |
| <b>Acta2 (a-SMA)</b> | Rn01759928_g1            |
| <b>Mmp2</b>          | Rn01538170_m1            |
| <b>Vegfa</b>         | Rn01511602_m1            |
| <b>Edn1</b>          | Rn00561129_m1            |
| <b>Hif1a</b>         | Rn01472831_m1            |
| <b>P4ha1</b>         | Rn00680265_m1            |
| <b>Epo</b>           | Rn01481376_m1            |

**Table S2:** The subset of genes that contributes most to the enrichment result of Hypoxia gene set in 14+6w DEN liver versus NoDEN liver.

|    | Name     | Rank in gene list | Rank metric score | Running enrichment score | Core enrichment |
|----|----------|-------------------|-------------------|--------------------------|-----------------|
| 1  | CA12     | 78                | 5.317             | 0.0233                   | Yes             |
| 2  | MAFF     | 89                | 5.117             | 0.0509                   | Yes             |
| 3  | PKP1     | 129               | 4.652             | 0.0737                   | Yes             |
| 4  | AMPD3    | 153               | 4.385             | 0.0962                   | Yes             |
| 5  | NDRG1    | 184               | 4.199             | 0.1171                   | Yes             |
| 6  | ANXA2    | 226               | 3.910             | 0.1356                   | Yes             |
| 7  | GPC3     | 246               | 3.753             | 0.1549                   | Yes             |
| 8  | TES      | 251               | 3.706             | 0.1751                   | Yes             |
| 9  | PGAM2    | 277               | 3.597             | 0.1931                   | Yes             |
| 10 | LOX      | 288               | 3.555             | 0.2121                   | Yes             |
| 11 | PDK3     | 456               | 2.917             | 0.2150                   | Yes             |
| 12 | VLDLR    | 479               | 2.832             | 0.2290                   | Yes             |
| 13 | FOSL2    | 505               | 2.770             | 0.2424                   | Yes             |
| 14 | RRAGD    | 526               | 2.732             | 0.2559                   | Yes             |
| 15 | HAS1     | 531               | 2.716             | 0.2707                   | Yes             |
| 16 | ATF3     | 536               | 2.701             | 0.2854                   | Yes             |
| 17 | SERPINE1 | 542               | 2.690             | 0.2999                   | Yes             |
| 18 | HK1      | 561               | 2.647             | 0.3132                   | Yes             |
| 19 | PFKFB3   | 634               | 2.491             | 0.3213                   | Yes             |
| 20 | ISG20    | 690               | 2.371             | 0.3301                   | Yes             |
| 21 | FOS      | 809               | 2.208             | 0.3329                   | Yes             |
| 22 | BCL2     | 824               | 2.189             | 0.3440                   | Yes             |
| 23 | STC2     | 834               | 2.174             | 0.3553                   | Yes             |
| 24 | GPC1     | 890               | 2.101             | 0.3626                   | Yes             |
| 25 | PLAUR    | 895               | 2.090             | 0.3739                   | Yes             |
| 26 | LXN      | 1060              | 1.906             | 0.3715                   | Yes             |
| 27 | PFKP     | 1091              | 1.876             | 0.3795                   | Yes             |
| 28 | DDIT4    | 1120              | 1.844             | 0.3875                   | Yes             |
| 29 | KDEL3    | 1157              | 1.812             | 0.3947                   | Yes             |
| 30 | PHKG1    | 1175              | 1.783             | 0.4033                   | Yes             |
| 31 | KLF6     | 1196              | 1.765             | 0.4115                   | Yes             |
| 32 | ADORA2B  | 1220              | 1.744             | 0.4193                   | Yes             |
| 33 | AKAP12   | 1255              | 1.715             | 0.4261                   | Yes             |
| 34 | ADM      | 1270              | 1.705             | 0.4345                   | Yes             |
| 35 | JUN      | 1361              | 1.627             | 0.4364                   | Yes             |
| 36 | IGFBP3   | 1462              | 1.560             | 0.4371                   | Yes             |
| 37 | PDGFB    | 1486              | 1.544             | 0.4438                   | Yes             |
| 38 | F3       | 1491              | 1.539             | 0.4521                   | Yes             |
| 39 | ALDOA    | 1553              | 1.498             | 0.4555                   | Yes             |
| 40 | HS3ST1   | 1639              | 1.439             | 0.4568                   | Yes             |
| 41 | IGFBP1   | 1644              | 1.436             | 0.4644                   | Yes             |
| 42 | STC1     | 1684              | 1.407             | 0.4691                   | Yes             |
| 43 | DCN      | 1696              | 1.400             | 0.4760                   | Yes             |
| 44 | S100A4   | 1762              | 1.355             | 0.4784                   | Yes             |
| 45 | DPYSL4   | 1864              | 1.297             | 0.4775                   | Yes             |
| 46 | INHA     | 1878              | 1.292             | 0.4837                   | Yes             |

**Table S3:** The subset of genes that contributes most to the enrichment result of Hypoxia gene set (14+6w DEN Tumor versus 14+6w DEN Non Tumor)

|    | Name     | Rank in gene list | Rank metric score | Running enrichment score | Core enrichment |
|----|----------|-------------------|-------------------|--------------------------|-----------------|
| 1  | NDRG1    | 191               | 1.976             | 0.0096                   | Yes             |
| 2  | IL6      | 194               | 1.963             | 0.0340                   | Yes             |
| 3  | PGAM2    | 197               | 1.961             | 0.0584                   | Yes             |
| 4  | GPC1     | 242               | 1.841             | 0.0779                   | Yes             |
| 5  | AMPD3    | 307               | 1.647             | 0.0934                   | Yes             |
| 6  | ANXA2    | 312               | 1.633             | 0.1135                   | Yes             |
| 7  | TES      | 361               | 1.585             | 0.1296                   | Yes             |
| 8  | PKP1     | 382               | 1.566             | 0.1476                   | Yes             |
| 9  | PDK3     | 384               | 1.563             | 0.1670                   | Yes             |
| 10 | CA12     | 416               | 1.502             | 0.1834                   | Yes             |
| 11 | PHKG1    | 418               | 1.496             | 0.2020                   | Yes             |
| 12 | SERPINE1 | 435               | 1.464             | 0.2190                   | Yes             |
| 13 | ADM      | 523               | 1.318             | 0.2286                   | Yes             |
| 14 | IGFBP3   | 535               | 1.299             | 0.2440                   | Yes             |
| 15 | HAS1     | 560               | 1.267             | 0.2580                   | Yes             |
| 16 | HK1      | 652               | 1.219             | 0.2660                   | Yes             |
| 17 | DDIT4    | 685               | 1.181             | 0.2782                   | Yes             |
| 18 | ISG20    | 733               | 1.135             | 0.2887                   | Yes             |
| 19 | MAFF     | 734               | 1.135             | 0.3029                   | Yes             |
| 20 | LOX      | 772               | 1.107             | 0.3138                   | Yes             |
| 21 | KDELRL3  | 773               | 1.106             | 0.3277                   | Yes             |
| 22 | F3       | 861               | 1.048             | 0.3339                   | Yes             |
| 23 | ATF3     | 879               | 1.039             | 0.3455                   | Yes             |
| 24 | GPC3     | 914               | 1.023             | 0.3556                   | Yes             |
| 25 | INHA     | 946               | 1.003             | 0.3657                   | Yes             |
| 26 | PLAUR    | 1042              | 0.938             | 0.3700                   | Yes             |
| 27 | PFKFB3   | 1070              | 0.926             | 0.3794                   | Yes             |
| 28 | PGF      | 1092              | 0.912             | 0.3891                   | Yes             |
| 29 | STC2     | 1095              | 0.910             | 0.4004                   | Yes             |
| 30 | PFKP     | 1123              | 0.891             | 0.4094                   | Yes             |
| 31 | FOSL2    | 1145              | 0.878             | 0.4187                   | Yes             |
| 32 | VLDLR    | 1383              | 0.830             | 0.4103                   | Yes             |
| 33 | ALDOA    | 1421              | 0.810             | 0.4175                   | Yes             |
| 34 | DPYSL4   | 1448              | 0.791             | 0.4254                   | Yes             |
| 35 | RRAGD    | 1551              | 0.743             | 0.4266                   | Yes             |

**Table S4:** The subset of genes that contributes to the enrichment result of Hallmark Myc Targets genesets induced by intermittent hypoxia in tumor tissue compared to tumor tissue under normoxia conditions.

| HALLMARK_MYC_TARGETS_V1 |       |                   |                   |                          | HALLMARK_MYC_TARGETS_V2 |       |                   |                   |                          |
|-------------------------|-------|-------------------|-------------------|--------------------------|-------------------------|-------|-------------------|-------------------|--------------------------|
|                         | Name  | Rank in gene list | Rank metric score | Running enrichment score |                         | Name  | Rank in gene list | Rank metric score | Running enrichment score |
| 1                       | POLD2 | 367               | 1.034             | 0.0002                   | 1                       | MCM4  | 447               | 0.898             | 0.0111                   |
| 2                       | LSM2  | 378               | 1.006             | 0.0020                   | 2                       | HSPD1 | 556               | 0.807             | 0.0446                   |
| 3                       | CDC20 | 418               | 0.941             | 0.0138                   | 3                       | HSPE1 | 742               | 0.734             | 0.0681                   |

# Supplementary Material

|    |          |      |       |        |    |         |      |       |        |
|----|----------|------|-------|--------|----|---------|------|-------|--------|
| 4  | DUT      | 432  | 0.920 | 0.0273 | 4  | NOP56   | 844  | 0.677 | 0.0953 |
| 5  | MCM4     | 447  | 0.898 | 0.0405 | 5  | IMP4    | 940  | 0.631 | 0.1207 |
| 6  | MCM6     | 475  | 0.869 | 0.0521 | 6  | WDR43   | 980  | 0.613 | 0.1495 |
| 7  | CCNA2    | 516  | 0.837 | 0.0622 | 7  | PA2G4   | 1050 | 0.583 | 0.1744 |
| 8  | PABPC4   | 523  | 0.835 | 0.0750 | 8  | PLK1    | 1092 | 0.564 | 0.2006 |
| 9  | HSPD1    | 556  | 0.807 | 0.0852 | 9  | IPO4    | 1130 | 0.548 | 0.2262 |
| 10 | SNRPA    | 696  | 0.761 | 0.0861 | 10 | TMEM97  | 1234 | 0.513 | 0.2448 |
| 11 | CDC45    | 705  | 0.755 | 0.0974 | 11 | DCTPP1  | 1305 | 0.495 | 0.2650 |
| 12 | CAD      | 713  | 0.749 | 0.1088 | 12 | AIMP2   | 1378 | 0.478 | 0.2842 |
| 13 | MCM7     | 727  | 0.740 | 0.1195 | 13 | CBX3    | 1422 | 0.467 | 0.3051 |
| 14 | HSPE1    | 742  | 0.734 | 0.1300 | 14 | PPAN    | 1453 | 0.462 | 0.3269 |
| 15 | PCNA     | 750  | 0.726 | 0.1410 | 15 | BYSL    | 1469 | 0.459 | 0.3496 |
| 16 | APEX1    | 780  | 0.707 | 0.1499 | 16 | NPM1    | 1567 | 0.440 | 0.3648 |
| 17 | HNRNPC   | 790  | 0.702 | 0.1603 | 17 | FARSA   | 1572 | 0.439 | 0.3874 |
| 18 | ERH      | 800  | 0.696 | 0.1707 | 18 | NOP2    | 1581 | 0.437 | 0.4096 |
| 19 | RANBP1   | 805  | 0.695 | 0.1814 | 19 | DDX18   | 1626 | 0.427 | 0.4283 |
| 20 | EIF2S1   | 808  | 0.693 | 0.1922 | 20 | UNG     | 1706 | 0.415 | 0.4437 |
| 21 | CCT4     | 826  | 0.685 | 0.2018 | 21 | SUPV3L1 | 1718 | 0.413 | 0.4644 |
| 22 | TUFM     | 834  | 0.683 | 0.2120 | 22 | PRMT3   | 1808 | 0.395 | 0.4779 |
| 23 | NOP56    | 844  | 0.677 | 0.2221 | 23 | SLC19A1 | 1818 | 0.392 | 0.4976 |
| 24 | PRDX3    | 871  | 0.661 | 0.2305 | 24 | CDK4    | 1831 | 0.390 | 0.5170 |
| 25 | PPM1G    | 894  | 0.653 | 0.2391 | 25 | MCM5    | 1853 | 0.388 | 0.5356 |
| 26 | RFC4     | 916  | 0.644 | 0.2476 | 26 | MYC     | 2007 | 0.365 | 0.5424 |
| 27 | EXOSC7   | 961  | 0.621 | 0.2539 | 27 | MYBBP1A | 2119 | 0.349 | 0.5517 |
| 28 | ODC1     | 962  | 0.621 | 0.2638 | 28 | PES1    | 2260 | 0.332 | 0.5578 |
| 29 | XPO1     | 970  | 0.618 | 0.2731 | 29 | TBRG4   | 2306 | 0.324 | 0.5711 |
| 30 | MCM2     | 975  | 0.615 | 0.2825 | 30 | NIP7    | 2343 | 0.318 | 0.5849 |
| 31 | MRPS18B  | 1039 | 0.587 | 0.2868 | 31 | NOLC1   | 2371 | 0.314 | 0.5991 |
| 32 | SRSF3    | 1041 | 0.587 | 0.2960 | 32 | NOP16   | 2526 | 0.296 | 0.6022 |
| 33 | PA2G4    | 1050 | 0.583 | 0.3046 | 33 | NOC4L   | 2554 | 0.292 | 0.6153 |
| 34 | SRSF7    | 1066 | 0.578 | 0.3126 | 34 | TCOF1   | 2598 | 0.288 | 0.6269 |
| 35 | HPRT1    | 1074 | 0.574 | 0.3212 |    |         |      |       |        |
| 36 | YWHAQ    | 1129 | 0.549 | 0.3255 |    |         |      |       |        |
| 37 | DDX21    | 1172 | 0.531 | 0.3306 |    |         |      |       |        |
| 38 | EEF1B2   | 1177 | 0.529 | 0.3387 |    |         |      |       |        |
| 39 | RRM1     | 1183 | 0.528 | 0.3467 |    |         |      |       |        |
| 40 | SET      | 1184 | 0.528 | 0.3550 |    |         |      |       |        |
| 41 | CTPS1    | 1192 | 0.525 | 0.3628 |    |         |      |       |        |
| 42 | PSMA6    | 1200 | 0.522 | 0.3706 |    |         |      |       |        |
| 43 | RPS2     | 1210 | 0.520 | 0.3781 |    |         |      |       |        |
| 44 | NCBP1    | 1248 | 0.510 | 0.3832 |    |         |      |       |        |
| 45 | HSP90AB1 | 1254 | 0.508 | 0.3909 |    |         |      |       |        |
| 46 | PTGES3   | 1268 | 0.504 | 0.3978 |    |         |      |       |        |
| 47 | PHB2     | 1326 | 0.489 | 0.4010 |    |         |      |       |        |
| 48 | C1QBP    | 1341 | 0.485 | 0.4076 |    |         |      |       |        |
| 49 | RPS10    | 1364 | 0.481 | 0.4135 |    |         |      |       |        |
| 50 | RAN      | 1376 | 0.479 | 0.4202 |    |         |      |       |        |
| 51 | AIMP2    | 1378 | 0.478 | 0.4277 |    |         |      |       |        |
| 52 | CBX3     | 1422 | 0.467 | 0.4316 |    |         |      |       |        |
| 53 | EIF4A1   | 1460 | 0.460 | 0.4360 |    |         |      |       |        |
| 54 | NPM1     | 1567 | 0.440 | 0.4344 |    |         |      |       |        |

|     |         |      |       |        |  |  |  |  |  |
|-----|---------|------|-------|--------|--|--|--|--|--|
| 55  | RNPS1   | 1569 | 0.440 | 0.4413 |  |  |  |  |  |
| 56  | SNRPA1  | 1617 | 0.430 | 0.4443 |  |  |  |  |  |
| 57  | DDX18   | 1626 | 0.427 | 0.4505 |  |  |  |  |  |
| 58  | SNRPD1  | 1678 | 0.419 | 0.4530 |  |  |  |  |  |
| 59  | FBL     | 1692 | 0.416 | 0.4586 |  |  |  |  |  |
| 60  | IMPDH2  | 1725 | 0.411 | 0.4625 |  |  |  |  |  |
| 61  | RPL6    | 1734 | 0.408 | 0.4684 |  |  |  |  |  |
| 62  | DEK     | 1750 | 0.405 | 0.4736 |  |  |  |  |  |
| 63  | BUB3    | 1765 | 0.402 | 0.4789 |  |  |  |  |  |
| 64  | PWP1    | 1813 | 0.393 | 0.4813 |  |  |  |  |  |
| 65  | TRA2B   | 1829 | 0.391 | 0.4863 |  |  |  |  |  |
| 66  | CDK4    | 1831 | 0.390 | 0.4924 |  |  |  |  |  |
| 67  | RUVBL2  | 1846 | 0.389 | 0.4975 |  |  |  |  |  |
| 68  | MCM5    | 1853 | 0.388 | 0.5032 |  |  |  |  |  |
| 69  | PABPC1  | 1856 | 0.388 | 0.5092 |  |  |  |  |  |
| 70  | RPS3    | 1859 | 0.388 | 0.5152 |  |  |  |  |  |
| 71  | PSMC6   | 1869 | 0.386 | 0.5206 |  |  |  |  |  |
| 72  | NDUFAB1 | 1906 | 0.382 | 0.5237 |  |  |  |  |  |
| 73  | CYC1    | 1908 | 0.381 | 0.5297 |  |  |  |  |  |
| 74  | IFRD1   | 1924 | 0.379 | 0.5345 |  |  |  |  |  |
| 75  | SSBP1   | 1944 | 0.376 | 0.5390 |  |  |  |  |  |
| 76  | MYC     | 2007 | 0.365 | 0.5398 |  |  |  |  |  |
| 77  | SRSF1   | 2022 | 0.363 | 0.5444 |  |  |  |  |  |
| 78  | PPIA    | 2035 | 0.361 | 0.5492 |  |  |  |  |  |
| 79  | EIF3D   | 2039 | 0.360 | 0.5547 |  |  |  |  |  |
| 80  | VDAC3   | 2045 | 0.360 | 0.5600 |  |  |  |  |  |
| 81  | MRPL9   | 2133 | 0.347 | 0.5585 |  |  |  |  |  |
| 82  | RPLP0   | 2164 | 0.343 | 0.5615 |  |  |  |  |  |
| 83  | CCT7    | 2179 | 0.341 | 0.5658 |  |  |  |  |  |
| 84  | EIF4G2  | 2192 | 0.340 | 0.5702 |  |  |  |  |  |
| 85  | RPL14   | 2214 | 0.338 | 0.5739 |  |  |  |  |  |
| 86  | GLO1    | 2218 | 0.337 | 0.5790 |  |  |  |  |  |
| 87  | PSMA1   | 2325 | 0.321 | 0.5755 |  |  |  |  |  |
| 88  | NOLC1   | 2371 | 0.314 | 0.5769 |  |  |  |  |  |
| 89  | RPL18   | 2404 | 0.310 | 0.5792 |  |  |  |  |  |
| 90  | SLC25A3 | 2405 | 0.310 | 0.5842 |  |  |  |  |  |
| 91  | EIF3B   | 2411 | 0.309 | 0.5887 |  |  |  |  |  |
| 92  | FAM120A | 2464 | 0.303 | 0.5893 |  |  |  |  |  |
| 93  | VDAC1   | 2502 | 0.299 | 0.5910 |  |  |  |  |  |
| 94  | NOP16   | 2526 | 0.296 | 0.5939 |  |  |  |  |  |
| 95  | CCT3    | 2529 | 0.295 | 0.5984 |  |  |  |  |  |
| 96  | CLNS1A  | 2530 | 0.295 | 0.6031 |  |  |  |  |  |
| 97  | TRIM28  | 2561 | 0.292 | 0.6053 |  |  |  |  |  |
| 98  | KPNA2   | 2631 | 0.283 | 0.6043 |  |  |  |  |  |
| 99  | SRSF2   | 2677 | 0.278 | 0.6050 |  |  |  |  |  |
| 100 | TCP1    | 2685 | 0.277 | 0.6089 |  |  |  |  |  |
| 101 | CCT2    | 2781 | 0.266 | 0.6054 |  |  |  |  |  |
| 102 | CDK2    | 2782 | 0.266 | 0.6097 |  |  |  |  |  |
| 103 | PSMB2   | 2840 | 0.260 | 0.6092 |  |  |  |  |  |
| 104 | SRPK1   | 2875 | 0.257 | 0.6105 |  |  |  |  |  |
| 105 | PGK1    | 2898 | 0.254 | 0.6128 |  |  |  |  |  |
| 106 | ABCE1   | 2923 | 0.251 | 0.6148 |  |  |  |  |  |

# Supplementary Material

|     |         |      |       |        |  |  |  |  |  |
|-----|---------|------|-------|--------|--|--|--|--|--|
| 107 | GOT2    | 2940 | 0.250 | 0.6175 |  |  |  |  |  |
| 108 | HDAC2   | 3024 | 0.242 | 0.6146 |  |  |  |  |  |
| 109 | HNRNPA1 | 3026 | 0.242 | 0.6184 |  |  |  |  |  |
| 110 | USP1    | 3101 | 0.236 | 0.6162 |  |  |  |  |  |
| 111 | YWHAE   | 3125 | 0.234 | 0.6180 |  |  |  |  |  |
| 112 | COX5A   | 3139 | 0.232 | 0.6207 |  |  |  |  |  |
| 113 | NME1    | 3151 | 0.231 | 0.6235 |  |  |  |  |  |
| 114 | SF3B3   | 3208 | 0.224 | 0.6225 |  |  |  |  |  |
| 115 | CCT5    | 3236 | 0.220 | 0.6238 |  |  |  |  |  |
| 116 | HDGF    | 3238 | 0.220 | 0.6272 |  |  |  |  |  |
| 117 | DHX15   | 3247 | 0.219 | 0.6301 |  |  |  |  |  |
| 118 | CANX    | 3258 | 0.218 | 0.6327 |  |  |  |  |  |
| 119 | PSMA2   | 3283 | 0.216 | 0.6342 |  |  |  |  |  |
| 120 | EIF4H   | 3322 | 0.212 | 0.6345 |  |  |  |  |  |
| 121 | SMARCC1 | 3373 | 0.208 | 0.6338 |  |  |  |  |  |
| 122 | KPNB1   | 3380 | 0.207 | 0.6366 |  |  |  |  |  |
| 123 | STARD7  | 3449 | 0.201 | 0.6343 |  |  |  |  |  |
| 124 | PSMD1   | 3532 | 0.193 | 0.6307 |  |  |  |  |  |
| 125 | HDHC2   | 3563 | 0.190 | 0.6313 |  |  |  |  |  |
| 126 | SSB     | 3580 | 0.189 | 0.6330 |  |  |  |  |  |
| 127 | RPS5    | 3597 | 0.187 | 0.6347 |  |  |  |  |  |
| 128 | PSMD14  | 3616 | 0.185 | 0.6362 |  |  |  |  |  |
| 129 | PRDX4   | 3651 | 0.182 | 0.6364 |  |  |  |  |  |
| 130 | G3BP1   | 3672 | 0.180 | 0.6376 |  |  |  |  |  |
